# Supplementary material for: Comprehensive analysis of 65 patients with Castleman disease in a single center in China
Source: PubMed Central journal article supplement (PMC9130315; doi:10.1038/s41598-022-12797-y), 2022-05-24
Supplement: 41598_2022_12797_MOESM1_ESM.pdf [file 41598_2022_12797_MOESM1_ESM.pdf]

## Supplementary Information

### Comprehensive analysis of 65 patients with Castleman disease in a single center in China

Xi-Qian Wang<sup>1,2,†</sup>, Nian-Nian Zhong<sup>2,†</sup>, Qi Sun<sup>3,†</sup>, Si-Chen Yan<sup>1</sup>, Guang-Cai Xu<sup>1</sup>, Yong-Gong Wang<sup>1</sup>,

Li-Wei Peng<sup>1,\*</sup>, Bing Liu<sup>2,4,\*</sup> and Lin-Lin Bu<sup>2,4,\*</sup>

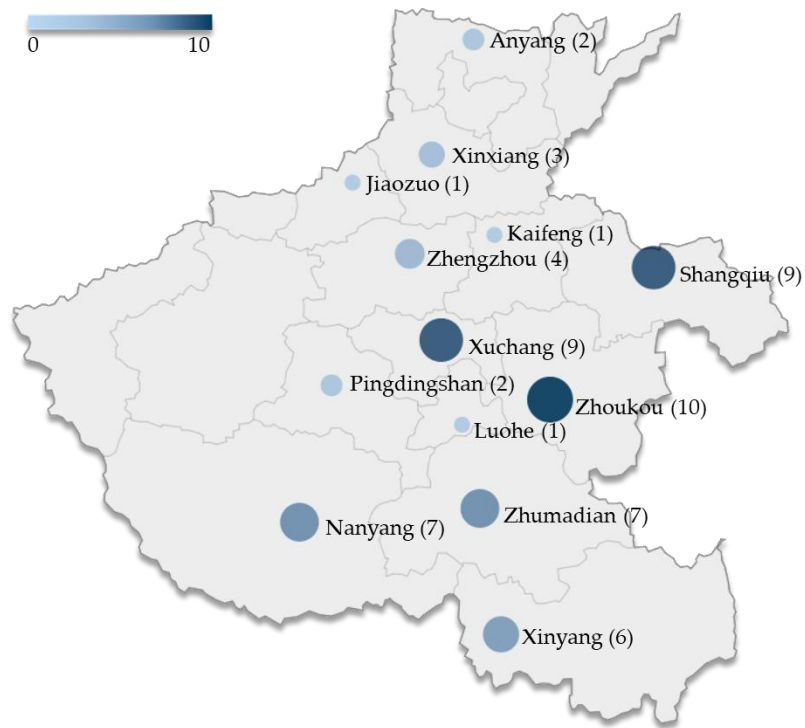

**Supplementary Figure S1. Birthplaces of patients.** 62 patients with CD from Henan Province in central China were distributed in 13 cities.

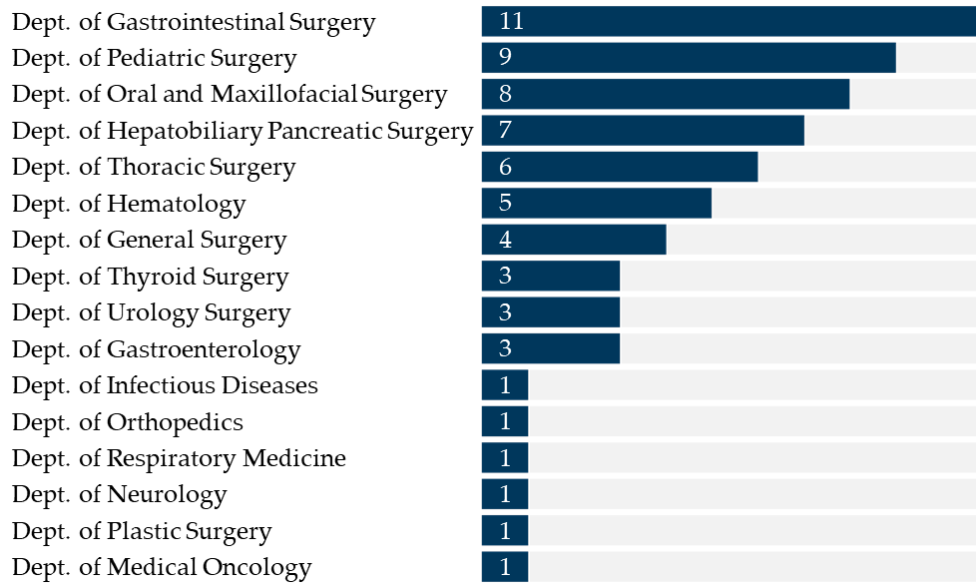

**Supplementary Figure S2. Admission departments.** Data of 65 patients with CD were collected from 16 departments in the hospital. Distribution of their source departments revealed the most frequent initial admission departments.

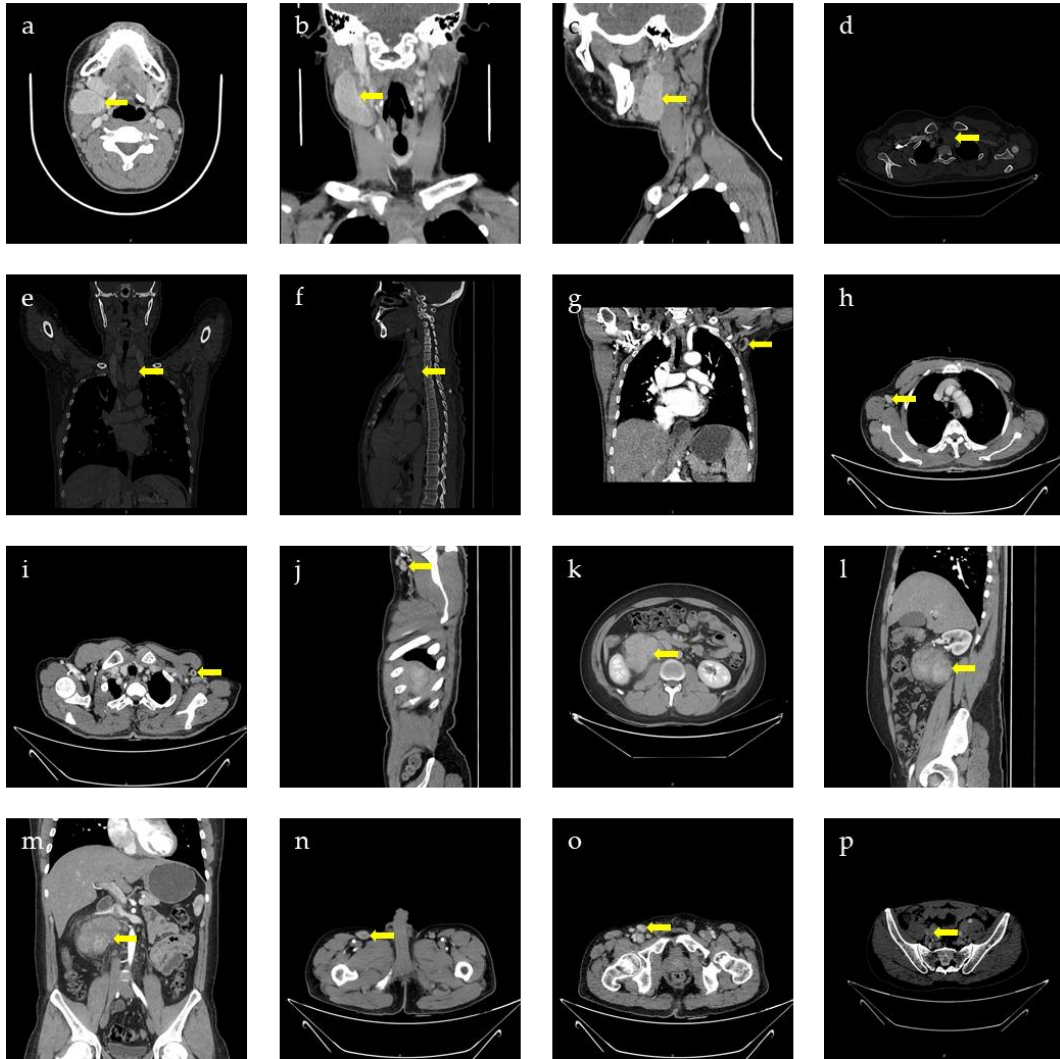

**Supplementary Figure S3. Radiological examinations.** CT images on different planes showed the enlarged lymph nodes in neck (a-c), mediastinum (d-f), axilla (g-j), abdomen (k-m), groin (n-o) and pelvis (p) of 6 patients with CD, among which patients with lymphadenopathies in neck/mediastinum/abdomen were with UCD/HV subtype and the other three were with MCD/PC subtype.

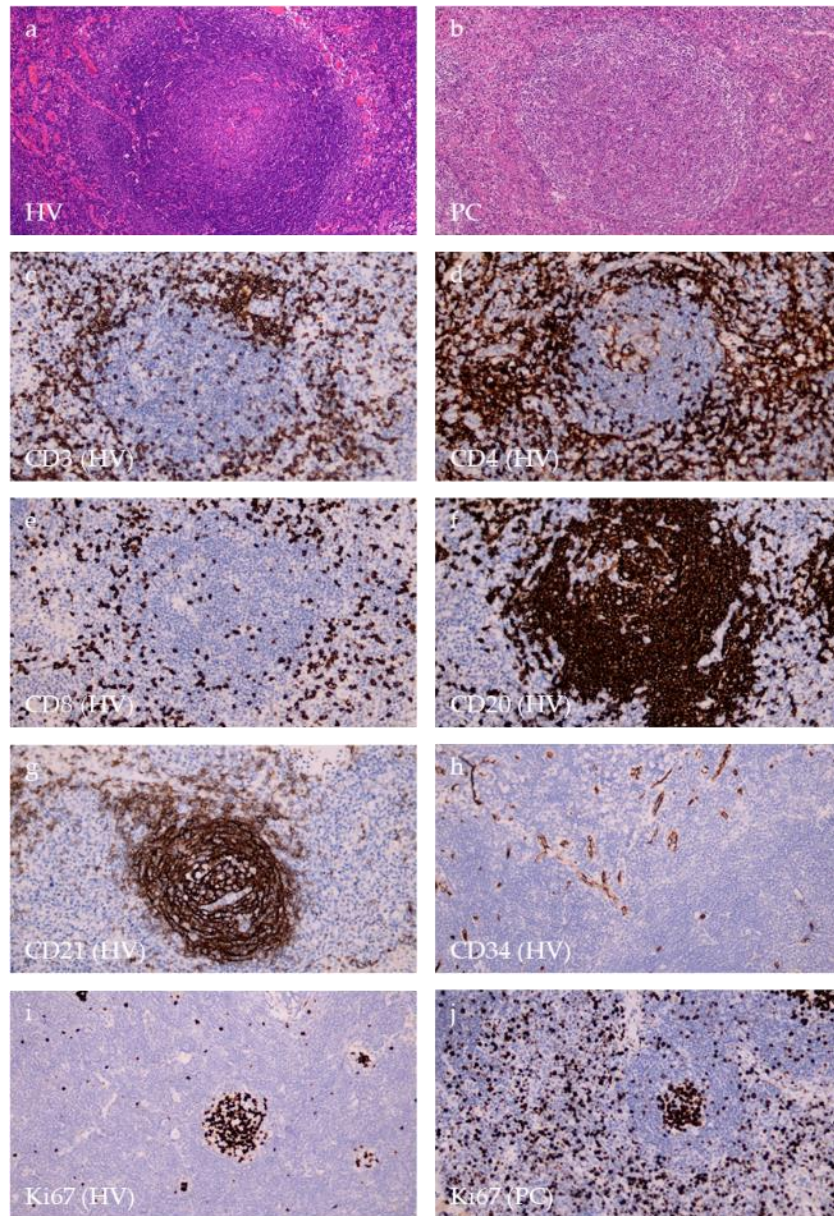

**Supplementary Figure S4. HE and IHC staining.** a. HE staining of an HV variant ( $\times 100$ ); b. HE staining of a PC variant ( $\times 100$ ); c. CD3-IHC staining of an HV variant ( $\times 200$ ); d. CD4-IHC staining of an HV variant ( $\times 200$ ); e. CD8-IHC staining of an HV variant ( $\times 200$ ); f. CD20-IHC staining of an HV variant ( $\times 200$ ); g. CD21-IHC staining of an HV variant ( $\times 100$ ); h. CD34-IHC staining of an HV variant ( $\times 100$ ); i. Ki67-IHC staining of an HV variant ( $\times 100$ ); j. Ki67-IHC staining of a PC variant ( $\times 100$ ).

| Index     | Count | Index        | Count | Index      | Count | Index                      | Count |
|-----------|-------|--------------|-------|------------|-------|----------------------------|-------|
| Ki67      | 65    | HHV-8        | 15    | Factor-8   | 4     | CK8                        | 1     |
| CD20      | 63    | IgG          | 14    | AFB        | 4     | c-Myc                      | 1     |
| CD3       | 62    | IgG4         | 14    | TB-DNA     | 4     | F XIII A                   | 1     |
| CD21      | 54    | CD79a        | 13    | CD99       | 3     | Granzyme B                 | 1     |
| Pax-5     | 49    | CD35         | 12    | CXCL-13    | 3     | Hepatocyte                 | 1     |
| CD23      | 42    | CD4          | 11    | Desmin     | 3     | MLH1                       | 1     |
| CD10      | 41    | CD163        | 11    | LCA        | 3     | MSH2                       | 1     |
| EBER      | 41    | CK (AE1/AE3) | 11    | P63        | 3     | MSH6                       | 1     |
| CD138     | 37    | CD68         | 9     | ALK        | 2     | Mucin-1                    | 1     |
| Bcl-2     | 37    | CD15         | 8     | CD7        | 2     | Oct-2                      | 1     |
| CD38      | 35    | EMA          | 8     | CD117      | 2     | P53                        | 1     |
| CD5       | 34    | CD1a         | 7     | CK20       | 2     | PD-1                       | 1     |
| Mum-1     | 34    | CD8          | 7     | SMA        | 2     | PD-L1 (22C3)               | 1     |
| CD43      | 30    | CD123        | 7     | TIA-1      | 2     | PMS2                       | 1     |
| Bcl-6     | 27    | TdT          | 7     | IgM        | 2     | Villin                     | 1     |
| Kappa     | 27    | S-100        | 6     | Arginase-1 | 1     | HBcAg                      | 1     |
| Lambda    | 27    | CD31         | 5     | Bob-1      | 1     | HBsAg                      | 1     |
| CD34      | 22    | CD56         | 5     | CgA        | 1     | IGH/IGK gene rearrangement | 1     |
| Cyclin-D1 | 19    | CK           | 4     | CK/D2-40   | 1     | PAS                        | 1     |
| CD2       | 16    | CK19         | 4     | CK5/6      | 1     | TCR seq                    | 1     |
| CD30      | 16    | EBNA2        | 4     | CK7        | 1     |                            |       |

**Supplementary Figure S5. Choices of pathological index for CD.** 83 pathological indexes (including IHC and molecular pathology) were listed in order of the number of times they were tested in 65 patients with CD in this study.

**Supplementary Table S1 Epidemiologic characteristics of patients with UCD and MCD**

|                                                                                | UCD                                | MCD                                | Total no. of patients with available data |
|--------------------------------------------------------------------------------|------------------------------------|------------------------------------|-------------------------------------------|
| <b>Sex, n (%)</b>                                                              | 33 (50.8%)                         | 32 (49.2%)                         | 65                                        |
| Male                                                                           | 13 (39.4%)                         | 21 (65.6%)                         | 34 (52.3%)                                |
| Female                                                                         | 20 (60.6%)                         | 11 (34.4%)                         | 31 (47.7%)                                |
| <b>Pathological subtype, n (%)</b>                                             | 33 (50.8%)                         | 32 (49.2%)                         | 65                                        |
| HV                                                                             | 27 (81.8%)                         | 12 (37.5%)                         | 39 (60.0%)                                |
| PC                                                                             | 3 (9.1%)                           | 19 (59.4%)                         | 22 (33.8%)                                |
| Mixed                                                                          | 3 (9.1%)                           | 1 (3.1%)                           | 4 (6.2%)                                  |
| <b>Age at disease onset (years), mean <math>\pm</math> SD (min-max), n (%)</b> | 36.1 $\pm$ 18.0 (2-73), 32 (50.0%) | 40.9 $\pm$ 19.9 (3-71), 32 (50.0%) | 38.5 $\pm$ 18.9 (2-73), 64                |
| HV                                                                             | 34.8 $\pm$ 17.7 (2-73), 26 (81.3%) | 35.8 $\pm$ 20.9 (5-66), 12 (37.5%) | 35.1 $\pm$ 18.5 (2-73), 38 (59.4%)        |
| PC                                                                             | 54.7 $\pm$ 5.5 (51-61), 3 (9.4%)   | 44.0 $\pm$ 19.6 (3-71), 19 (59.4%) | 45.5 $\pm$ 18.6 (3-71), 22 (34.4%)        |
| Mixed                                                                          | 28.7 $\pm$ 21.2 (6-48), 3 (9.4%)   | 43, 1 (3.1%)                       | 32.3 $\pm$ 18.7 (6-48), 4 (6.3%)          |
| <b>Diagnosis delay (months), median, n (%)</b>                                 | 1.25, 32 (50.0%)                   | 3.00, 32 (50.0%)                   | 2.50, 64                                  |
| HV                                                                             | 0.79, 26 (81.3%)                   | 3.50, 12 (37.5%)                   | 2.00, 38 (59.4%)                          |
| PC                                                                             | 1.50, 3 (9.4%)                     | 2.50, 19 (59.4%)                   | 2.50, 22 (34.4%)                          |
| Mixed                                                                          | 3.00, 3 (9.4%)                     | 0.46, 1 (3.1%)                     | 2.00, 4 (6.3%)                            |

**Supplementary Table S2 Clinical findings of patients with UCD and MCD**

|                                           | UCD             | MCD              | Total no. of patients with available data |
|-------------------------------------------|-----------------|------------------|-------------------------------------------|
| <b>Location of lymphadenopathy, n (%)</b> | 33 (50.8%)      | 32 (49.2%)       | 65                                        |
| Neck                                      | 10 (30.3%)      | 21 (65.6%)       | 31 (47.7%)                                |
| Abdomen                                   | 13 (39.4%)      | 6 (18.8%)        | 19 (29.2%)                                |
| Axilla                                    | 0               | 8 (25.0%)        | 8 (12.3%)                                 |
| Groin                                     | 1 (3.0%)        | 7 (21.9%)        | 8 (12.3%)                                 |
| Mediastinum                               | 4 (12.1%)       | 3 (9.4%)         | 7 (10.8%)                                 |
| Pelvis                                    | 3 (9.1%)        | 2 (6.3%)         | 5 (7.7%)                                  |
| Parotid gland                             | 1 (3.0%)        | 1 (3.1%)         | 2 (3.1%)                                  |
| Lung                                      | 1 (3.0%)        | 0                | 1 (1.5%)                                  |
| Elbow                                     | 1 (3.0%)        | 0                | 1 (1.5%)                                  |
| <b>Signs and symptoms, n (%)</b>          | 33 (50.8%)      | 32 (49.2%)       | 65                                        |
| Fever                                     | 0               | 10 (31.3%)       | 10 (15.4%)                                |
| Cough                                     | 0               | 2 (6.3%)         | 2 (3.1%)                                  |
| Marasmus                                  | 0               | 1 (3.1%)         | 1 (1.5%)                                  |
| <b>Comorbidities, n (%)</b>               | 9 (27.3%) of 33 | 10 (31.3%) of 32 | 19 (29.2%) of 65                          |
| Liver                                     | 5 (15.2%)       | 3 (9.4%)         | 8 (12.3%)                                 |
| Splenomegaly                              | 2 (6.1%)        | 4 (12.5%)        | 6 (9.2%)                                  |
| Oedema/effusion                           | 1 (3.0%)        | 3 (9.4%)         | 4 (6.2%)                                  |
| Kidney                                    | 1 (3.0%)        | 3 (9.4%)         | 4 (6.2%)                                  |
| Lung                                      | 2 (6.1%)        | 1 (3.1%)         | 3 (4.6%)                                  |
| Thyroid                                   | 2 (6.1%)        | 1 (3.1%)         | 3 (4.6%)                                  |
| Gallbladder                               | 0               | 1 (3.1%)         | 1 (1.5%)                                  |
| Stomach                                   | 1 (3.0%)        | 0                | 1 (1.5%)                                  |
| Ovary                                     | 1 (3.0%)        | 0                | 1 (1.5%)                                  |
| Femur                                     | 1 (3.0%)        | 0                | 1 (1.5%)                                  |
| Paroxysmal disturbance of consciousness   | 0               | 1 (3.1%)         | 1 (1.5%)                                  |

**Supplementary Table S3 Pathological findings of patients with UCD and MCD**

|                                                                                                | UCD                                  | MCD                                 | Total no. of patients with available data |
|------------------------------------------------------------------------------------------------|--------------------------------------|-------------------------------------|-------------------------------------------|
| <b>HHV-8, n (%)</b>                                                                            | 8                                    | 7                                   | 15                                        |
| Positive                                                                                       | 0                                    | 1 (14.3%)                           | 1 (6.7%)                                  |
| Negative                                                                                       | 8 (100%)                             | 6 (85.7%)                           | 14 (93.3%)                                |
| <b>Major diameter of pathological specimen (cm), mean <math>\pm</math> SD (min-max), n (%)</b> | 6.4 $\pm$ 2.2 (2.5-12), 33 (50.8%)   | 3.1 $\pm$ 1.9 (0.6-8.0), 32 (49.2%) | 4.7 $\pm$ 2.6 (0.6-12.0), 65              |
| HV                                                                                             | 6.5 $\pm$ 2.2 (3.0-12.0), 27 (81.8%) | 3.5 $\pm$ 1.9 (1.0-6.6), 12 (37.5%) | 5.6 $\pm$ 2.5 (1.0-12.0), 39 (60.0%)      |
| PC                                                                                             | 7.3 $\pm$ 1.5 (6.0-9.0), 3 (9.1%)    | 2.9 $\pm$ 2.0 (0.6-8.0), 19 (59.4%) | 3.5 $\pm$ 2.5 (0.6-9.0), 22 (33.8%)       |
| Mixed                                                                                          | 4.3 $\pm$ 1.8 (2.5-6.0), 3 (9.1%)    | 1.2, 1 (3.1%)                       | 3.6 $\pm$ 2.1 (1.2-6.0), 4 (6.2%)         |



Supplementary Table S4 Chemotherapy regimens and follow-up

|     | Patient no. | Chemotherapy regimens                                                        | Follow-up time (months) | Follow-up results |
|-----|-------------|------------------------------------------------------------------------------|-------------------------|-------------------|
| UCD | 1           | lansoprazole + vidarabine monophosphate + lienal polypeptide                 | 80                      | alive, NR         |
|     | 2           | no detail                                                                    | 90                      | loss of follow up |
| MCD | 3           | CHOP                                                                         | 32                      | alive, NR         |
|     | 4           | CHOP                                                                         | 23                      | died, PD          |
|     | 5           | CHOP                                                                         | 105                     | alive, NR         |
|     | 6           | CHOP                                                                         | 13                      | alive, NR         |
|     | 7           | CHOP                                                                         | 101                     | alive, NR         |
|     | 8           | CHOP                                                                         | 88                      | loss of follow up |
|     | 9           | CHOP                                                                         | 84                      | died, PD          |
|     | 10          | CHOP + CHOPE                                                                 | 98                      | alive, NR         |
|     | 11          | CHOP + IFN- $\alpha$ + thalidomide                                           | 101                     | alive, NR         |
|     | 12          | VD + VAD + CHOP + CHOPE                                                      | 105                     | alive, NR         |
|     | 13          | TCP                                                                          | 18                      | loss of follow up |
|     | 14          | pirarubicin (THP) + prednisone + vincristine sulfate (Oncovin) + tropisetron | 81                      | alive, NR         |
|     | 15          | rituximab + methylprednisolone                                               | 16                      | alive, NR         |
|     | 16          | rituximab                                                                    | 35                      | alive, NR         |
|     | 17          | no detail                                                                    | 27                      | alive, NR         |
|     | 18          | no detail                                                                    | 66                      | alive, NR         |

CHOP: cyclophosphamide + doxorubicin hydrochloride (hydroxydaunorubicin) + vincristine sulfate (Oncovin) + prednisone; CHOPE: CHOP + etoposide phosphate; VD: bortezomib (Velcade) + dexamethasone; VAD: vincristine + doxorubicin (Adriamycin) + dexamethasone; TCP: thalidomide + cyclophosphamide + prednisolone; NR: no recurrence; PD: progressive disease
